# Supplementary material
Source: PubMed Central journal article supplement (PMC8595757)
Supplement: NIHMS1733326-supplement-1.pdf [file NIHMS1733326-supplement-1.pdf]

## Supplemental Tables & Figures

**Table S1** Complete Composition of Three Experimental Diets

| Ingredient                                     | Experimental Exposure Diets |              |               |
|------------------------------------------------|-----------------------------|--------------|---------------|
|                                                | Control                     | Western      | Mediterranean |
| <i>Main Ingredients (g/100g food)</i>          |                             |              |               |
| Fat Source                                     | 7                           | <b>20.5*</b> | <b>21.4</b>   |
| Casein                                         | 20                          | 19           | 19            |
| Cornstarch                                     | 40                          | <b>14</b>    | <b>23</b>     |
| Dyestrose                                      | 13.2                        | 13.2         | 13.2          |
| Sucrose                                        | 10                          | <b>25.5</b>  | <b>9.2</b>    |
| Cellulose                                      | 5                           | <b>2</b>     | <b>8</b>      |
| Mineral Mix                                    | 3.5                         | <b>3.8</b>   | <b>3.8</b>    |
| Vitamin Mix                                    | 1                           | <b>1.1</b>   | <b>1.1</b>    |
| <i>Composition of Fat Source (g/100g food)</i> |                             |              |               |
| Corn Oil                                       | 100                         | <b>29</b>    | <b>4</b>      |
| Butter, anhydrous                              | 0                           | <b>33</b>    | <b>4</b>      |
| Palm Oil                                       | 0                           | <b>30</b>    | 0             |
| Olive Oil                                      | 0                           | <b>8</b>     | <b>91</b>     |
| Menheden (Fish) Oil                            | 0                           | 0            | <b>1</b>      |
| <i>Vitamins (unit/kg food)</i>                 |                             |              |               |
| Nicotinic acid (mg)                            | 30                          | 30           | 30            |
| Pantothenate (mg)                              | 15                          | 15           | 15            |
| Pyridoxine (mg)                                | 6                           | 6            | 6             |
| Thiamin (mg)                                   | 5                           | 5            | 5             |
| Riboflavin (mg)                                | 6                           | 6            | 6             |
| Folic acid (mg)                                | 2                           | <b>1</b>     | <b>4</b>      |
| Biotin (mg)                                    | 0.2                         | 0.2          | 0.2           |
| Vitamin B12 (ug)                               | 25                          | <b>10</b>    | <b>10</b>     |
| Vitamin K (ug)                                 | 900                         | 900          | 900           |
| Vitamin E (IU)                                 | 75                          | <b>25</b>    | 75            |
| Vitamin A (IU)                                 | 4000                        | 4000         | <b>8000</b>   |
| Vitamin D (IU)                                 | 1000                        | <b>400</b>   | 1000          |
| Choline (mg)                                   | 1000                        | 1000         | 1000          |
| Vitamin C (mg)                                 | 0                           | 0            | <b>500</b>    |

**Table S1** Complete Composition of Three Experimental Diets, **continued**

| Ingredient                     | Experimental Exposure Diets |             |               |
|--------------------------------|-----------------------------|-------------|---------------|
|                                | Control                     | Western     | Mediterranean |
| <i>Minerals (unit/kg food)</i> |                             |             |               |
| Calcium (mg)                   | 5000                        | 5000        | 5000          |
| Phosphorus (mg)                | 3000                        | 3000        | 3000          |
| Magnesium (mg)                 | 513                         | 513         | <b>850</b>    |
| Sodium (mg)                    | 1039                        | <b>7000</b> | 1039          |
| Potassium (mg)                 | 3600                        | 3600        | <b>8000</b>   |
| Chloride (mg)                  | 1631                        | 1631        | 1631          |
| Sulfur (mg)                    | 300                         | 300         | 300           |
| Iron (mg)                      | 45                          | 45          | 45            |
| Zinc (mg)                      | 38                          | 38          | 38            |
| Manganese (mg)                 | 10                          | 10          | 10            |
| Copper (mg)                    | 6                           | 6           | 6             |
| Iodine (mg)                    | 0.2                         | 0.2         | 0.2           |
| Molybdenum (mg)                | 0.15                        | 0.15        | 0.15          |
| Selenium (mg)                  | 0.15                        | 0.15        | 0.15          |
| Silicon (mg)                   | 5                           | 5           | 5             |
| Chromium (mg)                  | 1                           | 1           | 1             |
| Flouride (mg)                  | 1                           | 1           | 1             |
| Nickel (mg)                    | 0.5                         | 0.5         | 0.5           |
| Boron (mg)                     | 0.5                         | 0.5         | 0.5           |
| Lithium (mg)                   | 0.1                         | 0.1         | 0.1           |
| Vanadium (mg)                  | 0.1                         | 0.1         | 0.1           |

\* **Bolded text** is used to emphasize nutrients in the Western and Mediterranean diet that differ significantly from the Control diet. These differences reflect nutrient differences in human Western and Mediterranean dietary intake patterns.

**Table S2** 10-Month Offspring Hepatic Lesions Assessed via Histopathology

| Hepatic Lesion                                       | Perinatal BPA Exposure | Experimental Diet: Mean (SD) |              |               | ANOVA p-value       | Tukey's p-values* |
|------------------------------------------------------|------------------------|------------------------------|--------------|---------------|---------------------|-------------------|
|                                                      |                        | Control                      | Western      | Mediterranean |                     |                   |
| <i>10-month Female Offspring</i>                     |                        |                              |              |               |                     |                   |
| Discrete Variables (Presence/Absence): Frequency (%) |                        |                              |              |               | Chi-squared p-value |                   |
| Adenoma                                              | No                     | 0                            | 0            | 0             | n.s.                | n.s.              |
|                                                      | Yes                    | 0                            | 0            | 0             |                     |                   |
| Nodular Hyperplasia                                  | No                     | 0/10 (0.00)                  | 0/12 (0.00)  | 0/11 (0.00)   | <b>0.0122</b>       | n.s.              |
|                                                      | Yes                    | 2/9 (22.22)                  | 0/11 (0.00)  | 4/12 (33.33)  |                     |                   |
| Oval Cell Hyperplasia                                | No                     | 5/11 (45.45)                 | 1/12 (8.33)  | 1/12 (8.33)   | <b>0.0094</b>       | n.s.              |
|                                                      | Yes                    | 3/11 (27.27)                 | 1/11 (9.09)  | 8/12 (66.67)  |                     |                   |
| Kupffer Cell Hyperplasia                             | No                     | 5/11 (45.45)                 | 1/12 (8.33)  | 2/12 (16.67)  | <b>0.0299</b>       | n.s.              |
|                                                      | Yes                    | 2/11 (18.18)                 | 2/11 (18.18) | 8/12 (66.67)  |                     |                   |
| Cell Infiltrates                                     | No                     | 8/11 (72.73)                 | 9/12 (75.00) | 9/12 (75.00)  | 0.7327              | n.s.              |
|                                                      | Yes                    | 7/11 (63.64)                 | 9/11 (81.82) | 11/12 (91.67) |                     |                   |
| Eosinophilic Foci                                    | No                     | 0/11 (0.00)                  | 0/12 (0.00)  | 0/12 (0.00)   | 0.3398              | n.s.              |
|                                                      | Yes                    | 1/11 (9.09)                  | 0/11 (0.00)  | 0/12 (0.00)   |                     |                   |
| Mixed Cell Foci                                      | No                     | 0                            | 0            | 0             | n.s.                | n.s.              |
|                                                      | Yes                    | 0                            | 0            | 0             |                     |                   |
| Clear Cell Foci                                      | No                     | 0/11 (0.00)                  | 0/12 (0.00)  | 0/12 (0.00)   |                     |                   |
|                                                      | Yes                    | 1/11 (9.09)                  | 0/11 (0.00)  | 0/12 (0.00)   |                     |                   |

**Table S2** 10-Month Offspring Hepatic Lesions Assessed via Histopathology, **continued**

| Hepatic Lesion                                       | Perinatal BPA Exposure | Experimental Diet: Mean (SD) |               |               | ANOVA p-value       | Tukey's p-values* |
|------------------------------------------------------|------------------------|------------------------------|---------------|---------------|---------------------|-------------------|
|                                                      |                        | Control                      | Western       | Mediterranean |                     |                   |
| <i>10-month Male Offspring</i>                       |                        |                              |               |               |                     |                   |
| Discrete Variables (Presence/Absence): Frequency (%) |                        |                              |               |               | Chi-squared p-value |                   |
| Adenoma                                              | No                     | 1/12 (8.33)                  | 2/12 (16.67)  | 2/10 (20.00)  | 0.4076              |                   |
|                                                      | Yes                    | 3/10 (30.00)                 | 3/12 (25.00)  | 0/12 (0.00)   |                     |                   |
| Nodular Hyperplasia                                  | No                     | 7/12 (58.33)                 | 5/12 (41.67)  | 3/10 (30.00)  | 0.2804              |                   |
|                                                      | Yes                    | 5/10 (50.00)                 | 3/12 (25.00)  | 2/12 (16.67)  |                     |                   |
| Oval Cell Hyperplasia                                | No                     | 7/12 (58.33)                 | 4/12 (33.33)  | 2/10 (20.00)  | 0.1349              |                   |
|                                                      | Yes                    | 5/11 (45.45)                 | 6/12 (50.00)  | 1/12 (8.33)   |                     |                   |
| Kupffer Cell Hyperplasia                             | No                     | 7/12 (58.33)                 | 4/12 (33.33)  | 2/10 (20.00)  | 0.1826              |                   |
|                                                      | Yes                    | 6/11 (54.55)                 | 6/12 (50.00)  | 2/12 (16.67)  |                     |                   |
| Cell Infiltrates                                     | No                     | 10/12 (83.33)                | 10/12 (83.33) | 9/10 (90.00)  | 0.8363              |                   |
|                                                      | Yes                    | 8/11 (72.73)                 | 10/12 (83.33) | 10/12 (83.33) |                     |                   |
| Eosinophilic Foci                                    | No                     | 0/12 (0.00)                  | 1/12 (8.33)   | 0/10 (0.00)   | 0.2093              |                   |
|                                                      | Yes                    | 2/11 (18.18)                 | 0/12 (0.00)   | 0/12 (0.00)   |                     |                   |
| Mixed Cell Foci                                      | No                     | 0/12 (0.00)                  | 1/12 (8.33)   | 0/10 (0.00)   | 0.6153              |                   |
|                                                      | Yes                    | 0/11 (0.00)                  | 1/12 (8.33)   | 1/12 (8.33)   |                     |                   |
| Clear Cell Foci                                      | No                     | 1/12 (8.33)                  | 1/12 (8.33)   | 0/10 (0.00)   | 0.551               |                   |
|                                                      | Yes                    | 1/11 (9.09)                  | 2/12 (16.67)  | 0/12 (0.00)   |                     |                   |

\*Only significant (p < 0.05) or borderline significant (p < 0.10) comparisons are shown; all others are not significant (n.s.).

**Figure S1** Lipid Composition of Three Experimental Mouse Diets

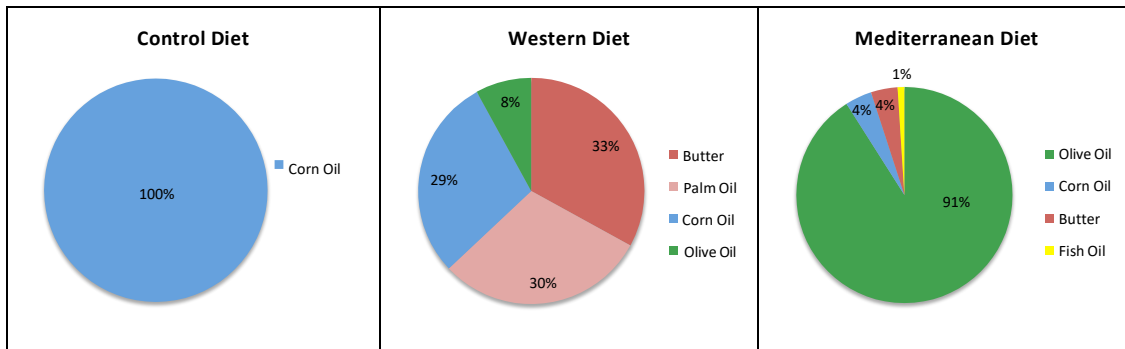

Figure S1 Legend: This figure illustrates the difference in lipid sources used to create each of the study's three experimental diets. Corn oil was the sole lipid source in the Control diet. Saturated fats composed >60% of the Western diet, contributed largely by butter and palm oil. In the Mediterranean diet, olive oil was the main source; fish oil was also added to reflect the higher n-3 PUFA content of human Mediterranean diets.

**Figure S2** Pre-Pregnancy Body Weight Change in Dams by Exposure Group: First Two Weeks of Exposure

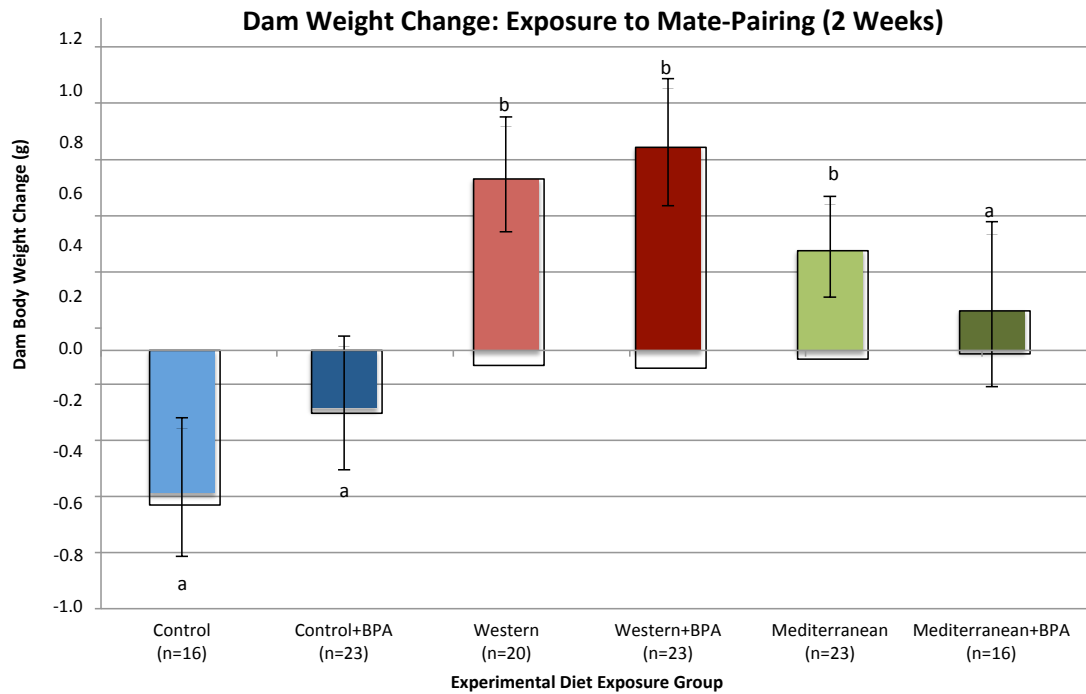

**Figure S2 Legend:** Dams were exposed to one of six experimental diets for two weeks prior to mate-pairing. Body weight changed as the dams adjusted to their new diets. This figure illustrates the average weight change by exposure group; error bars denote the SEM for each group. <sup>a</sup> Denotes the average weight of Control dams; groups that do not differ significantly from Control are also marked with 'a'. <sup>b</sup> Denotes exposure groups with average weights that differ significantly ( $p < 0.05$ ) from Control.

**Figure S3** Body Weight Change in Dams by Exposure Group: Initial Exposure to Offspring Weaning

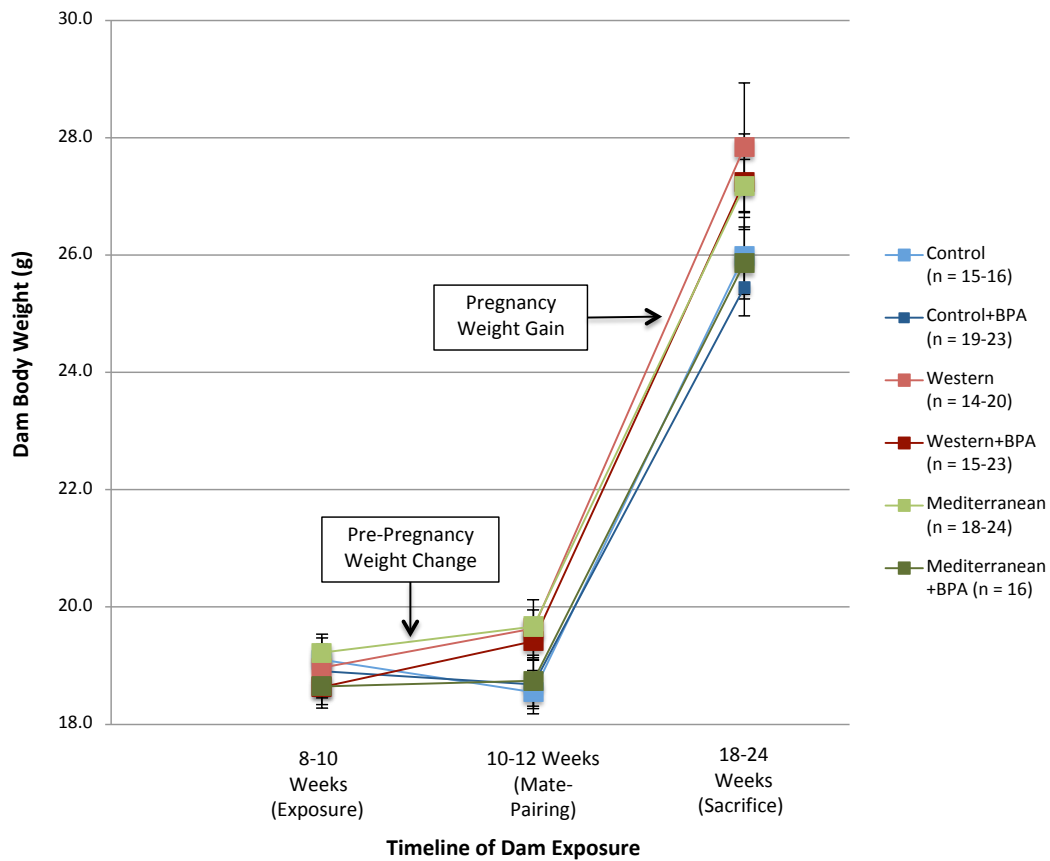

**Figure S3 Legend:** Dam body weight was measured at three time points: (1) start of exposure to experimental diets at 8-10 weeks of age, (2) at mate-pairing two weeks later, (3) and four days after their pups were weaned (PND25). Mean body weight of dams in each exposure group is plotted above with the SEM designated by the error brackets.

**Figure S4** Variation in Body Size, Liver Health and Mesenteric Adiposity at 10-Months

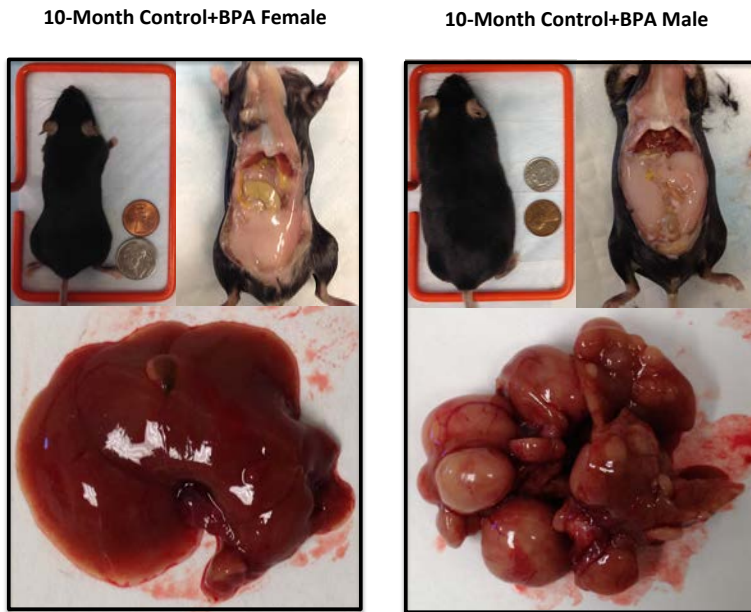

Figure S4 Legend: A female and male mouse perinatally exposed to the Control +BPA diet had very different hepatic responses to the exposure. The female mouse (left) weighed only 25.1g, had a relative liver weight of 3.6%, relative MAT weight of 2.1%, and a dark red, healthy liver with only minimal vacuolation and hypertrophy. In contrast, the male mouse (right) weighed 47.4g, had a relative liver weight of 5.9%, relative MAT weight of 3.3%, and a yellowish-pink liver, riddled with masses and moderate to severe hyperplasia. This example is indicative of the range of responses observed within the same perinatal exposure group, across all study groups. So although many hepatic outcomes did not differ by perinatal exposure, there was a wide range of responses among the individual study animals.
